# Supplementary material for: Determination of inequable fate and toxicity of Ag nanoparticles in a Phanerochaete chrysosporium biofilm system through different sulfide sources
Source: Royal Society of Chemistry journal article supplement (doi:10.1039/c6en00156d), 2016-01-01
Supplement: c6en00156d1.pdf [file c6en00156d1.pdf]

## **Determination of Inequable Fate and Toxicity of Ag Nanoparticles in *Phanerochaete chrysosporium* Biofilm System through Different Sulfide Sources**

Zhi Guo,<sup>a,b</sup> Guiqiu Chen,<sup>\*,a,b</sup> Guangming Zeng,<sup>\*,a,b</sup> Jie Liang,<sup>a,b</sup> Binbin Huang,<sup>a,b</sup> Zhihua Xiao,<sup>c</sup>

Feng Yi,<sup>a,b</sup> Zhenzhen Huang,<sup>a,b</sup> Kai He<sup>a,b</sup>

<sup>a</sup>College of Environmental Science and Engineering, Hunan University, Changsha 410082, P.R.  
China

<sup>b</sup>Key Laboratory of Environmental Biology and Pollution Control (Hunan University), Ministry of  
Education, Changsha 410082, P.R. China

<sup>c</sup>College of Bioscience and Biotechnology, Hunan Agricultural University, Changsha, Hunan,  
410128, China

### **Contents:**

12 pages

11 Figures

2 Tables

## FIGURE LEGENDS:

**Figure S1.** TEM of PVP-AgNP (A) and Cit-AgNP (B).

**Figure S2.** Schematic of the designed microcosm.

**Figure S3.** Photographs of quartz sands (A) and *P. chryso sporium* pellets (B).

**Figure S4.** LSPR absorbance of PVP-AgNP and Cit-AgNP in pure water and natural water.

**Figure S5.** Zeta potential of the identical samples of PVP-AgNP (A) and Cit-AgNP (B) after adding various concentrations of cysteine and Na<sub>2</sub>S.

**Figure S6.** Dissolved silver concentrations after ultrafiltration centrifugation at 2 h reaction with sulfide.

**Figure S7.** Reservation ratio of padding (quartz sands) for PVP-AgNP (A) and Cit-AgNP (B) after adding 1.0 and 50.0 mg/L cysteine and Na<sub>2</sub>S.

**Figure S8.** Effect of cysteine (1.0 and 50.0 mg/L) and Na<sub>2</sub>S (1.0 and 50.0 mg/L) on the viability of *P. chryso sporium* cell.

**Figure S9.** Cit-AgNP induced viability change of *P. chryso sporium* biofilm in the presence of 1.0 mg/L sulfide (A) and 50.0 mg/L sulfide (B).

**Figure S10.** Effect of cysteine (1.0 and 50.0 mg/L) and Na<sub>2</sub>S (1.0 and 50.0 mg/L) on the toxicity of Ag<sup>+</sup>.

**Figure S11.** Effect of cysteine (1.0 and 50.0 mg/L) and Na<sub>2</sub>S (1.0 and 50.0 mg/L) on the intracellular ROS production.

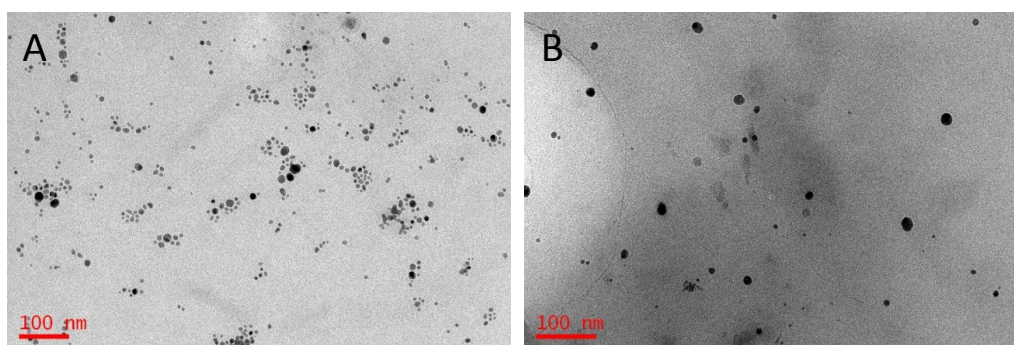

**Figure S1.** TEM of PVP-AgNP (A) and Cit-AgNP (B).

Table S1. Characterization of PVP- and Cit-AgNP stock suspensions changes.

| <b>PVP-AgNP</b>                  | <b>Just Synthesis</b> | <b>1 Month</b>  | <b>3 Month</b>  | <b>5 Month</b>  |
|----------------------------------|-----------------------|-----------------|-----------------|-----------------|
| Particle size (nm, by DLS)       | $39.8 \pm 4.3$        | $40.1 \pm 6.8$  | $40.9 \pm 2.5$  | $41.6 \pm 5.2$  |
| Zeta-potential (mV)              | $-17.3 \pm 1.8$       | $-16.0 \pm 2.2$ | $-16.2 \pm 1.5$ | $-16.5 \pm 1.3$ |
| Dissolved Ag <sup>+</sup> (μg/L) | $1.78 \pm 0.15$       | $1.83 \pm 0.09$ | $2.11 \pm 0.17$ | $2.42 \pm 0.21$ |
| <b>Cit-AgNP</b>                  | <b>Just Synthesis</b> | <b>1 Month</b>  | <b>3 Month</b>  | <b>5 Month</b>  |
| Particle size (nm, by DLS)       | $24.5 \pm 2.7$        | $24.9 \pm 1.8$  | $25.7 \pm 2.4$  | $27.4 \pm 4.6$  |
| Zeta-potential (mV)              | $-15.6 \pm 0.6$       | $-15.9 \pm 1.7$ | $-14.4 \pm 2.3$ | $-15.1 \pm 1.0$ |
| Dissolved Ag <sup>+</sup> (μg/L) | $0.52 \pm 0.06$       | $0.52 \pm 0.04$ | $0.57 \pm 0.09$ | $0.63 \pm 0.08$ |

Table S2. Relevant parameters of water sample.

|                      |                 |                 |                               |
|----------------------|-----------------|-----------------|-------------------------------|
| <b>Species</b>       | S <sup>2-</sup> | Cl <sup>-</sup> | PO <sub>4</sub> <sup>3-</sup> |
| <b>Concentration</b> | 0.012 mg/L      | 0.010 mg/L      | 0.005 mg/L                    |
| <b>Species</b>       | Cysteine        | Ag <sup>+</sup> | Total Ag                      |
| <b>Concentration</b> | –               | 0.135 µg/L      | 0.264 µg/L                    |

– indicates no signal was detected.

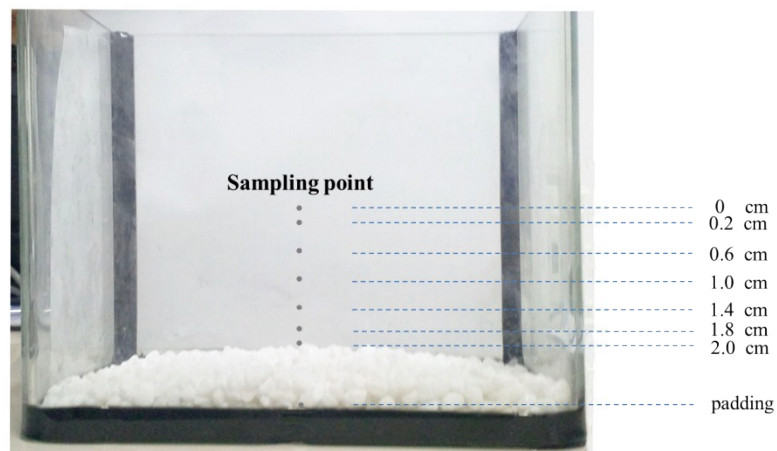

Figure S2. Schematic of the designed microcosm.

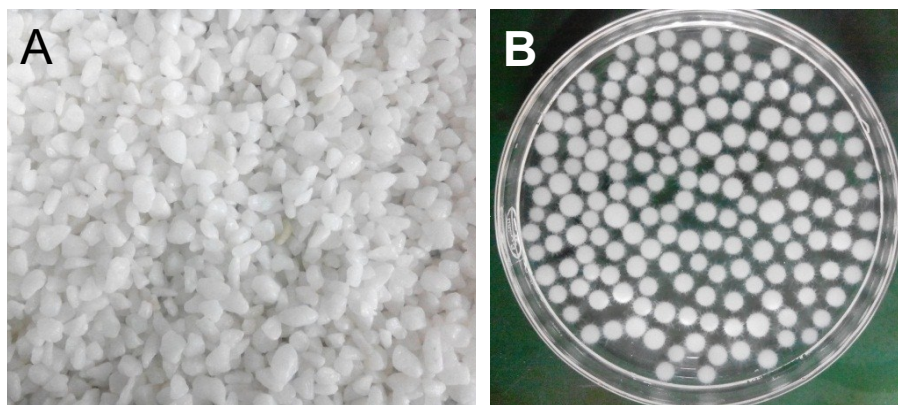

Figure S3. Photographs of quartz sands (A) and *P. chrysosporium* pellets (B).

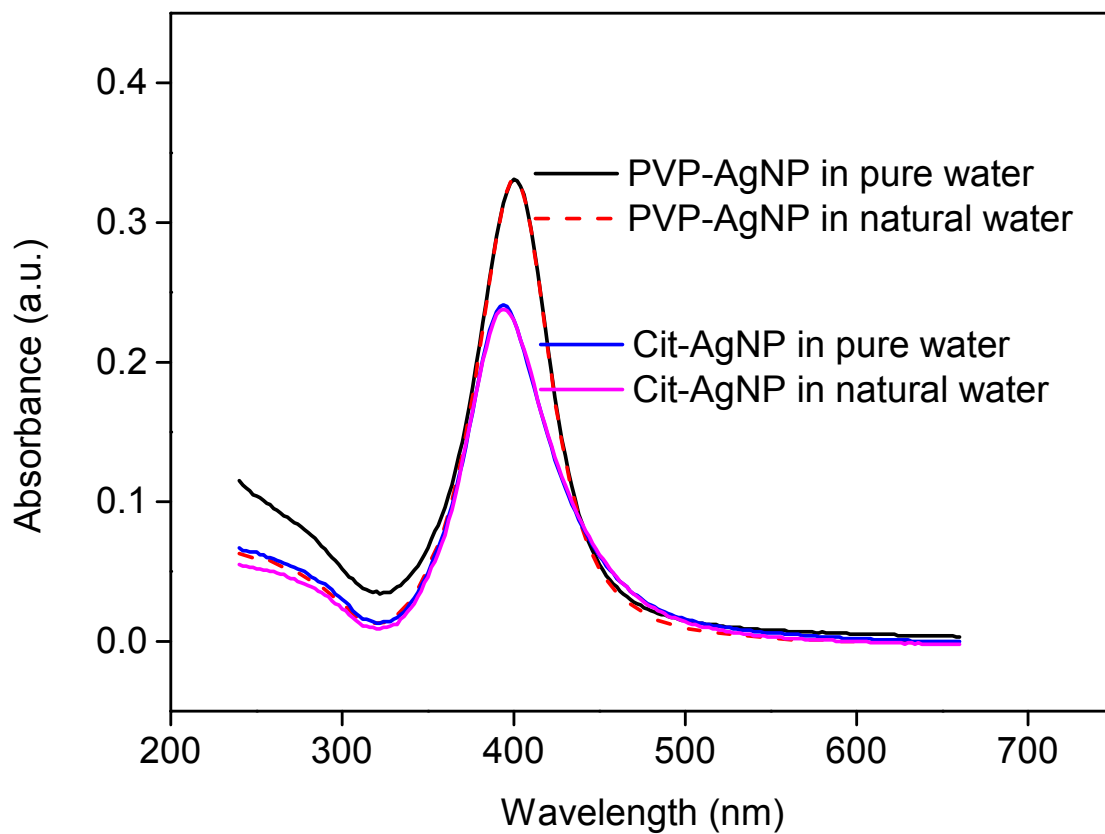

**Figure S4.** LSPR absorbance of PVP-AgNP and Cit-AgNP in pure water and natural water. The concentration of both AgNP was 2 mg/L in a consistent volume of 4 mL water sample. Data was measured after 2 h reaction.

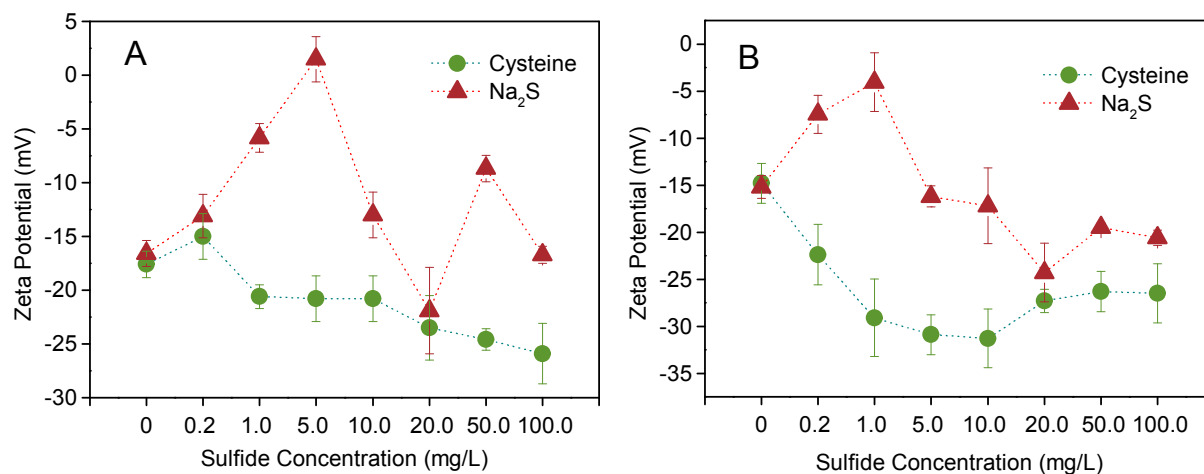

**Figure S5.** Zeta potential of the identical samples of PVP-AgNP (A) and Cit-AgNP (B) after adding various concentrations of cysteine and Na<sub>2</sub>S. Both AgNP concentrations were 2 mg/L.

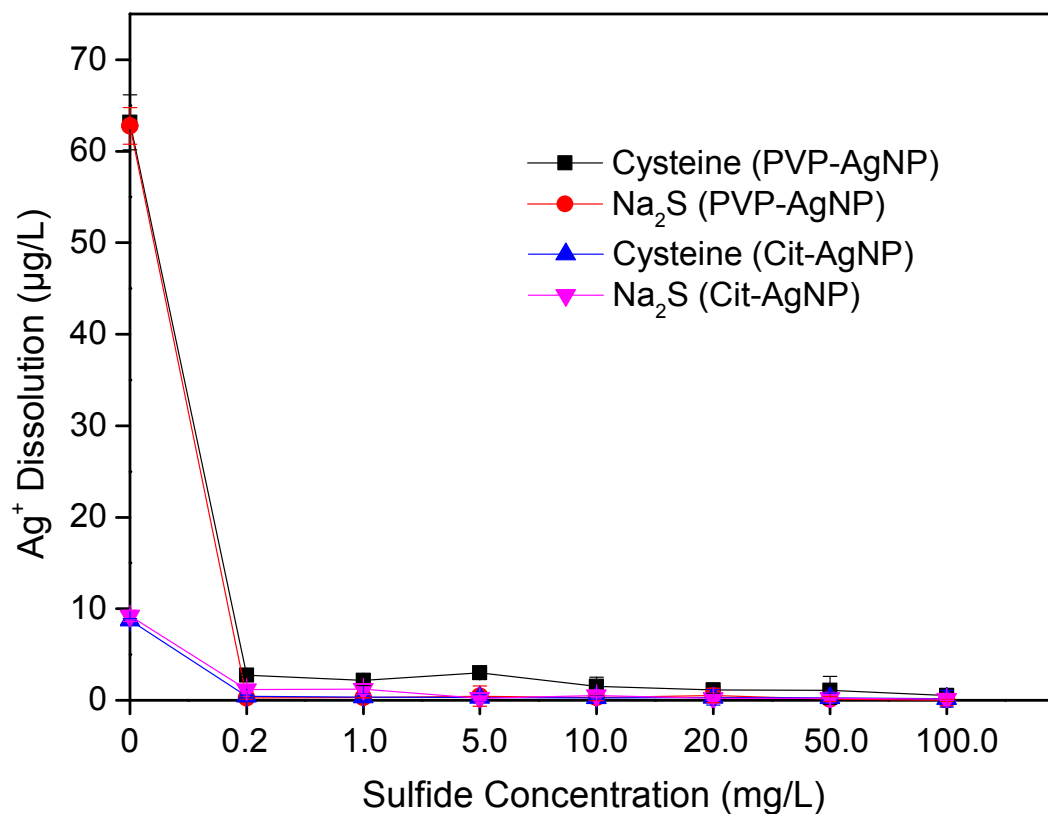

**Figure S6.** Dissolved silver concentrations after ultrafiltration centrifugation at 2 h reaction with sulfide. The initial concentrations of PVP-AgNP and Cit-AgNP are 2 mg/L. Filtration leaves only free, uncomplexed silver. Error bars represent one standard deviation. Lines are to guide the eye.

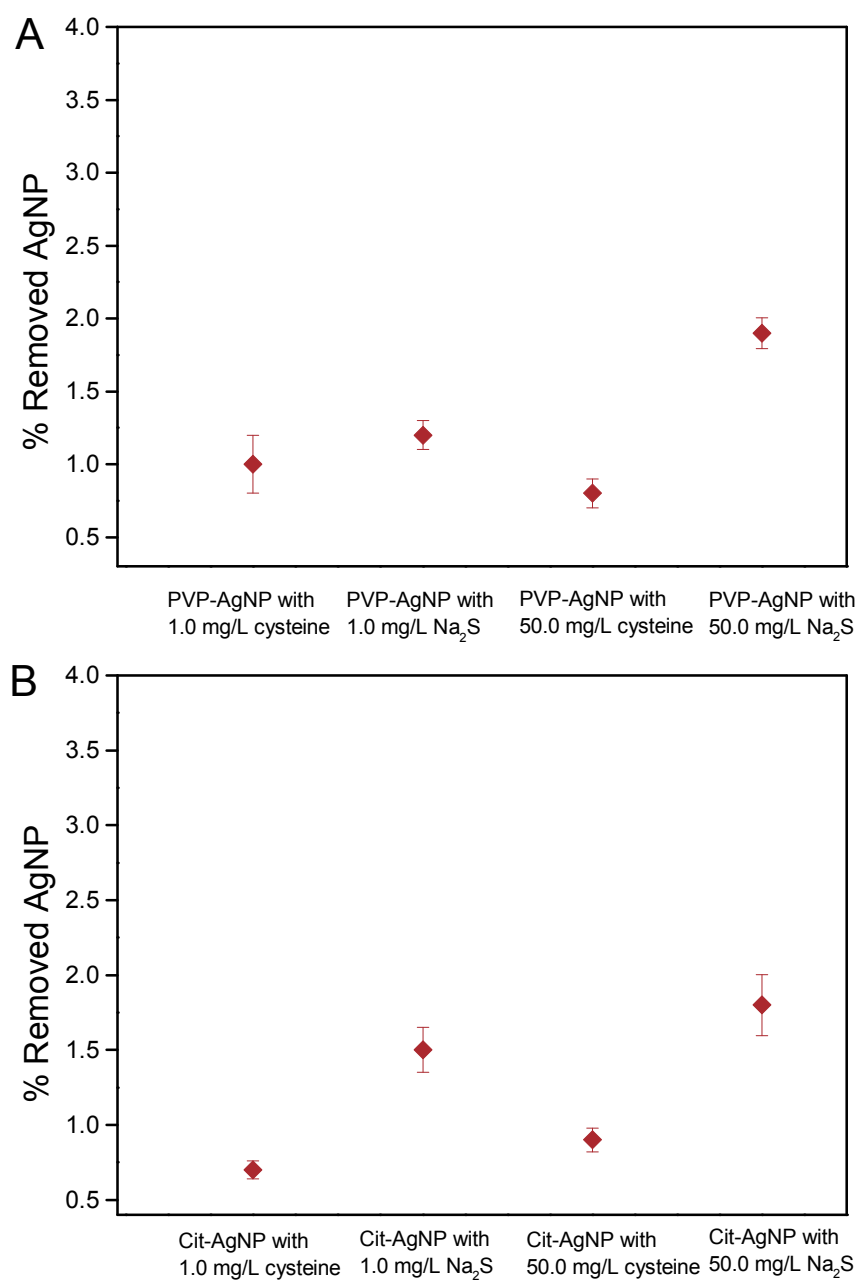

**Figure S7.** Reservation ratio of padding (quartz sands) for PVP-AgNP (A) and Cit-AgNP (B) after adding 1.0 and 50.0 mg/L cysteine and Na<sub>2</sub>S. Both AgNP concentrations were 2 mg/L. The error bars represent 95% confidence intervals.



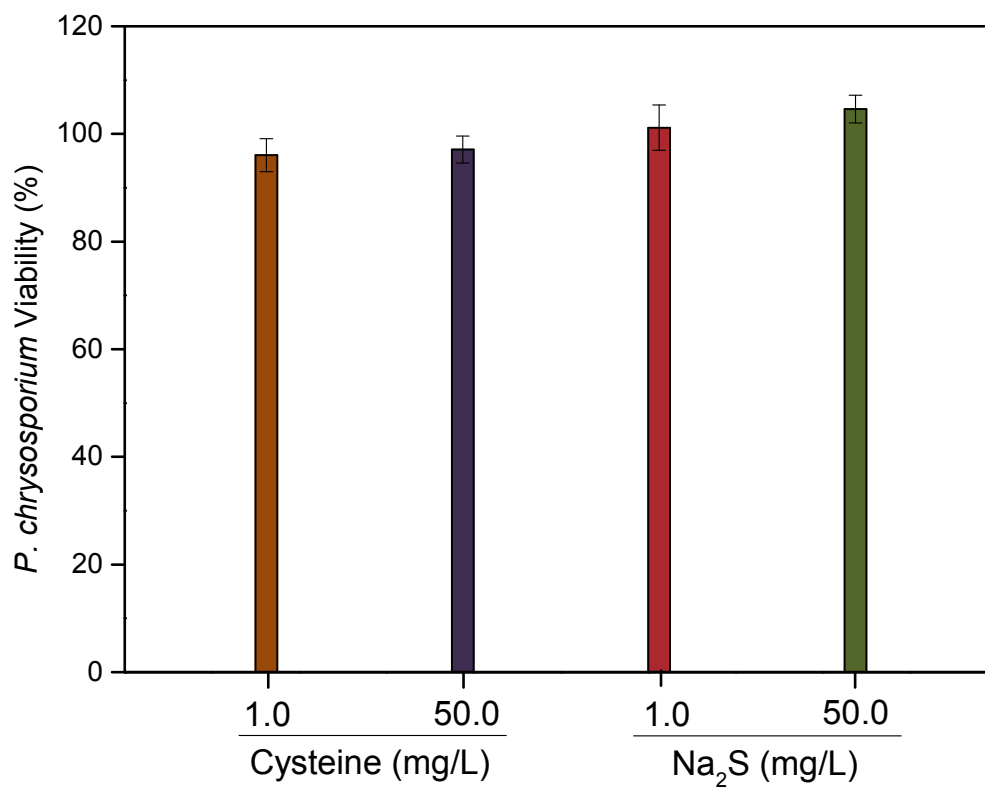

**Figure S8.** Effect of cysteine (1.0 and 50.0 mg/L) and Na<sub>2</sub>S (1.0 and 50.0 mg/L) on the viability of *P. chrysosporium* cell. The viability of blank sample was set as 100% and the viability of treated samples was a relative value comparing to the blank.

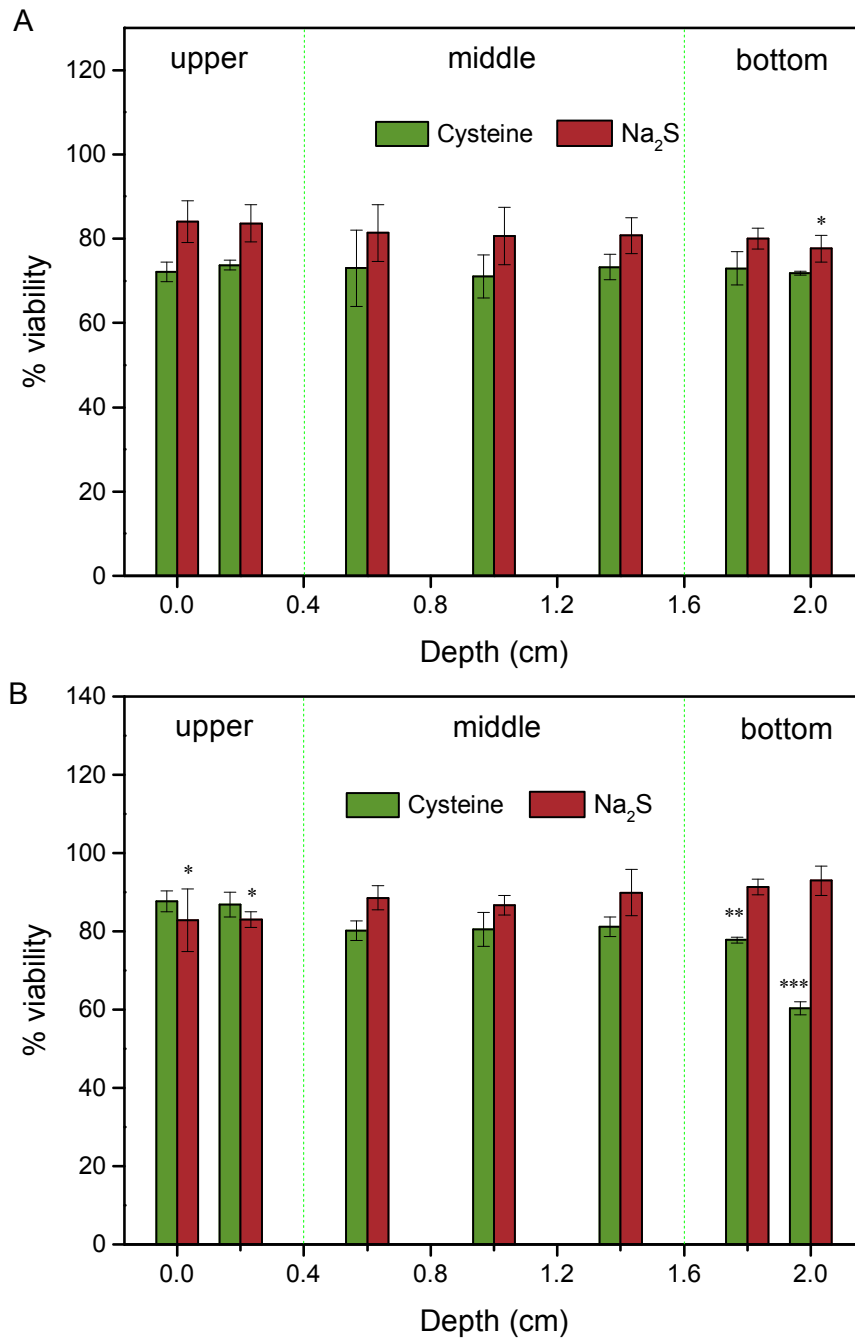

**Figure S9.** Cit-AgNP induced viability change of *P. chrysosporium* biofilm in the presence of 1.0 mg/L sulfide (A) and 50.0 mg/L sulfide (B). The viability of blank sample was set as 100%. The viability of treated samples was a relative value comparing to the blank. ‘\*’ denotes  $p < 0.05$ ; ‘\*\*’ denotes  $p < 0.01$ ; and ‘\*\*\*’ denotes  $p < 0.001$  as compared to the viability of each depth; significant difference was analyzed by one-way ANOVA.

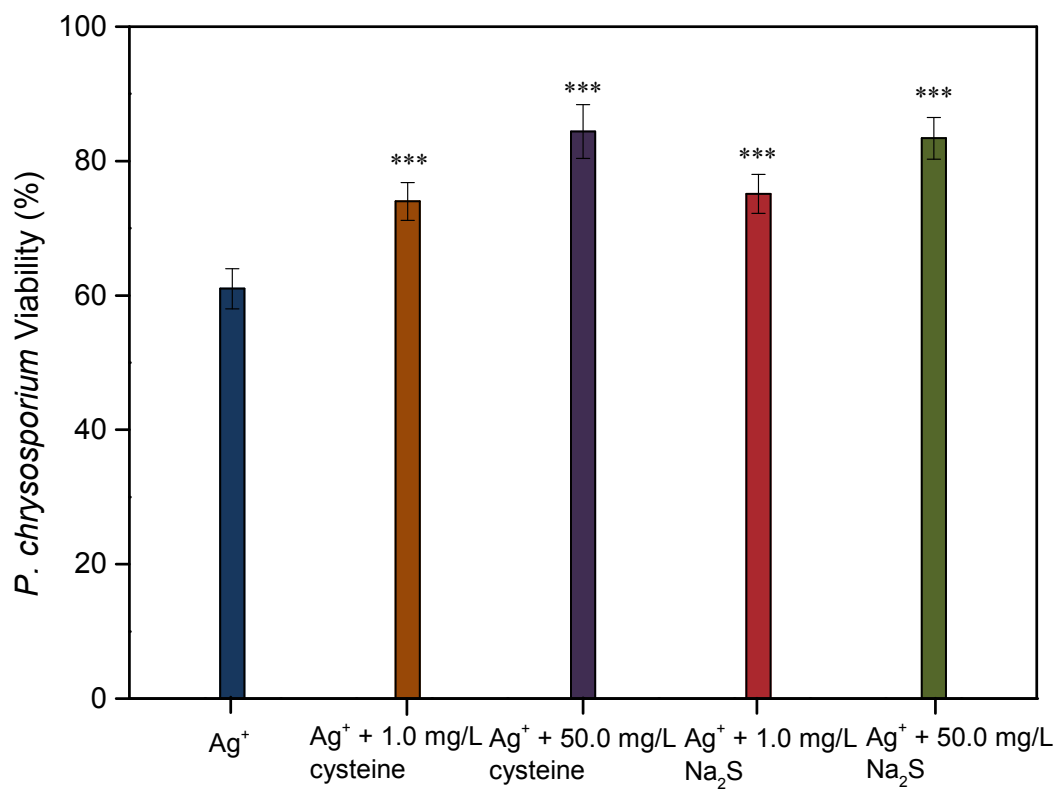

**Figure S10.** Effect of cysteine (1.0 and 50.0 mg/L) and Na<sub>2</sub>S (1.0 and 50.0 mg/L) on the toxicity of Ag<sup>+</sup>. The concentration was Ag<sup>+</sup> 500 µg/L. ‘\*\*\*’ denotes p < 0.001 as compared to the viability of blank (Ag<sup>+</sup> without sulfide).

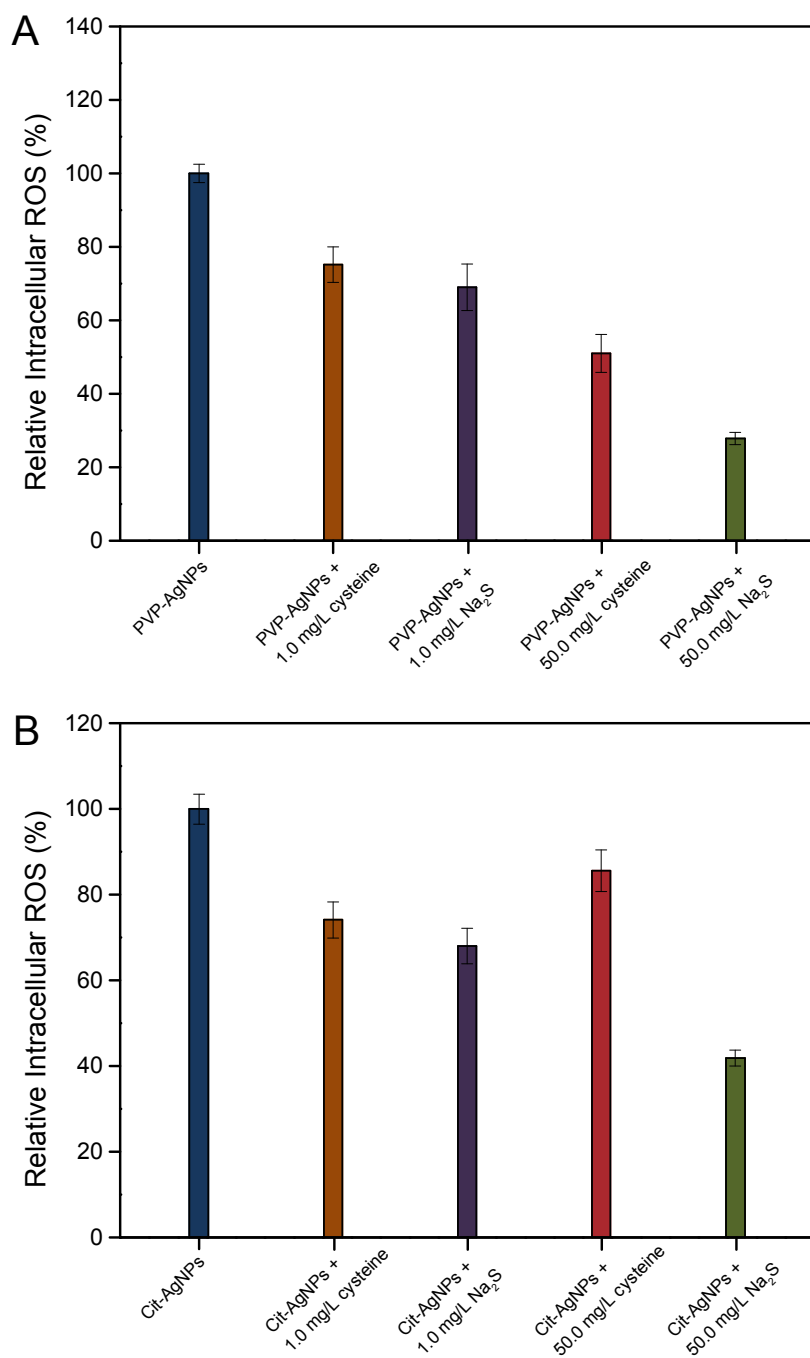

**Figure S11.** Effect of cysteine (1.0 and 50.0 mg/L) and Na<sub>2</sub>S (1.0 and 50.0 mg/L) on the intracellular ROS production. The quantity of pure AgNP induced ROS production was set as 100% as blank sample. The groups of sulfide treatments were a percentage comparing to the blank.
